# Supplementary material
Source: bioRxiv or medRxiv preprint supplement (https://www.biorxiv.org/content/biorxiv/early/2020/11/12/2020.11.11.378893.1/DC2/embed/media-2.pdf)
Supplement: Supplementary file [file media-2.pdf]

697  
698  
699  
700  
701  
702  
703  
704  
705  
706  
707  
708  
709  
710  
711  
712  
713  
714  
715  
716  
717  
718

**SUPPLEMENTARY MATERIALS FOR:**

**Glia actively sculpt sensory neurons by controlled phagocytosis to tune animal behavior**

Stephan Raiders<sup>1,2</sup>, Erik Black<sup>1</sup>, Andrea Bae<sup>3,4</sup>, Steve MacFarlane<sup>5</sup>, Shai Shaham<sup>3</sup> and Aakanksha Singhvi<sup>1, 2, 6, 7, \*</sup>

\*Correspondence and reagent requests to: [asinghvi@fredhutch.org](mailto:asinghvi@fredhutch.org)

**This PDF file includes:**

- Materials and Methods
- Figures. S1 to S4
- Captions for Movie S1
- Supplementary Materials Reference List

**Other Supplementary Materials for this manuscript include the following:**

- Movie S1

719 **MATERIALS AND METHODS**

720 **Worm methods**

721 *C. elegans* animals were cultured as previously described (Brenner, 1974; Stiernagle, 2006).  
722 Bristol N2 strain was used as wild type. For all experiments, animals were raised at 20°C for at  
723 least two generations without starvation, picked as L4 larvae onto fresh plate and assayed 1 day  
724 later, unless otherwise noted. Germ-line transformations by micro-injection to generate  
725 unstable extra-chromosomal array transgenes were carried out using standard protocols (Mello  
726 and Fire, 1995). Integration of extra-chromosomal arrays was performed using UV+ tri-methyl  
727 psoralen.

728

729 **Strains and plasmids**

730 Some strains listed below in Sections A and B were sourced from (a) the CGC, funded by NIH  
731 Office of Research Infrastructure Programs (P40 OD010440), (b) the International *C. elegans*  
732 Gene Knockout Consortium (*C. elegans* Gene Knockout Facility at the Oklahoma Medical  
733 Research Foundation, funded by the National Institutes of Health; and the *C. elegans* Reverse  
734 Genetics Core Facility at the University of British Columbia, funded by the Canadian Institute for  
735 Health Research, Genome Canada, Genome BC, the Michael Smith Foundation, and the  
736 National Institutes of Health) and (c) National BioResource Project (NBRP), Japan.

737

738 **A. Mutants**

739 LG1: *tax-2(p691)*, *ced-12(n3261)*, *ced-12(k149)*, *psr-1(tm469)*, *ced-1(e1754)*, *ced-1(e1735)*, *scrm*  
740 *-1(tm805)*, *aex-5(sa23)*, *kpc-1(gk8)*, *unc-73(e936)*

741 LG2: *eff-1(ns634)*

742 LG3: *ttr-52(tm2078), ced-6(n1813), tat-1(tm1034), tax-4(p678), ced-7(n2094), ver-1(ok1738),*  
743 *ver-2(ok897), ina-1(gm144)*

744 LG4: *ced-10(n3246), ced-10(n1993), ced-2(e1752), ced-5(n1812), unc-31(e928), cng-3(jh113)*

745 LG5: *ttx-1(p767)*

746 LGX: *dyf-11(mn392), ced-8(n1819), ver-3(ok891), ver-4(ok1079), egl-15(n484)*

747 **B. Integrated transgenes**

| Strain ID                                     | Chromosome | Genotype                                  | Reference                                                        |
|-----------------------------------------------|------------|-------------------------------------------|------------------------------------------------------------------|
| <i>nsIs228</i>                                | I          | <i>P<sub>srtx-1</sub>:GFP</i>             | (Colosimo et al., 2004;<br>Singhvi et al., 2016)                 |
| <i>nsIs481, nsIs482,<br/>nsIs483, nsIs484</i> |            | <i>P<sub>gcy-8</sub>:gcy-8:GFP</i>        | This study. Integration of<br>nsEx3945 (Singhvi et al.,<br>2016) |
| <i>nsIs645, nsIs647</i>                       | X          | <i>P<sub>srtx-1B</sub>:STRX-1:GFP</i>     | This study. Integration of<br>nsEx4078.                          |
| <i>nsIs143</i>                                | X          | <i>P<sub>F16F9.3</sub>:DsRed</i>          | (Procko et al., 2011)                                            |
| <i>nsIs109</i>                                |            | <i>P<sub>F16F9.3</sub>:DTA(G53E)</i>      | (Bacaj et al., 2008)                                             |
| <i>dnals1, dnals2,<br/>dnals3, dnals4</i>     |            | <i>P<sub>srtx-1B</sub>:HisCl1:SL2:GFP</i> | This study. Integration of<br>nsEx5340.                          |
| <i>dnals5</i>                                 |            | <i>P<sub>srtx-1B</sub>:SRTX-1:Dendra2</i> | This study. Integration of<br>dnaEx38.                           |

|                      |  |                                                |                                     |
|----------------------|--|------------------------------------------------|-------------------------------------|
| <i>dnals6-dnals9</i> |  | <i>P<sub>F53F4.13</sub>:CED-10:SL2:mCherry</i> | This study. Integration of nsEx5365 |
|----------------------|--|------------------------------------------------|-------------------------------------|

748

749 **C. Unstable extra-chromosomal array transgenes and plasmids generated in this study**

750 All transgenic arrays were generated with 5ng/μl *P<sub>elt-2</sub>:mCherry*, 20ng/μl, *P<sub>mig-24</sub>:Venus*, or 20ng/μl

751 *P<sub>unc-122</sub>:RFP*(Miyabayashi et al., 1999) as co-injection markers(Abraham et al., 2007; Armenti et

752 al., 2014; Miyabayashi et al., 1999). Further information is available upon request.

| Extra-chromosomal array<br>(nsEx or dnaEX) number       | Plasmid              | Genotype                                                                  |
|---------------------------------------------------------|----------------------|---------------------------------------------------------------------------|
| <i>nsEx3944, nsEx3945, nsEx3946,</i><br><i>nsEx3947</i> | Recombineered fosmid | Singhvi et al, 2016                                                       |
| <i>nsEx4733, nsEx4734,</i><br><i>nsEx4857, nsEx4763</i> | Recombineered fosmid | <i>P<sub>gcy-18</sub>:gcy-18:GFP</i><br>+ <i>elt-2:mCherry</i>            |
| <i>nsEx4803, nsEx4765</i>                               | Recombineered fosmid | <i>P<sub>gcy-23</sub>:gcy-23:GFP</i><br>+ <i>elt-2:mCherry</i>            |
| <i>nsEx4392, nsEx4393,</i><br><i>nsEx4394, nsEx4446</i> | pAS428               | <i>P<sub>srtx-1B</sub>:DYF-11:GFP</i><br>+ <i>elt-2:mCherry</i>           |
| <i>nsEx4051, nsEx4077, nsEx4078</i>                     | pAS322               | <i>P<sub>srtx-1B</sub>:SRTX-1:GFP</i><br>+ <i>P<sub>unc-122</sub>:RFP</i> |
| <i>nsEx4570, nsEx4616, nsEx4688</i>                     | pAS447               | <i>P<sub>srtx-1</sub>:EGL-1 + P<sub>mig-24</sub>:Venus</i>                |

|                                                     |        |                                                                                                    |
|-----------------------------------------------------|--------|----------------------------------------------------------------------------------------------------|
| <i>nsEx5266, nsEx5340, nsEx5356</i>                 | pAS540 | <i>P<sub>srtx-1</sub>:HisCl1:SL2:GFP</i><br>+ <i>elt-2:mCherry</i>                                 |
| <i>nsEx5365, nsEx5381, nsEx5382</i>                 | pAS275 | <i>P<sub>F53F4.13</sub>:CED-10B:SL2:mCherry</i><br>+ <i>P<sub>mig-24</sub>:Venus</i>               |
| <i>dnaEx1, dnaEx2, dnaEx3</i>                       | pSAR1  | <i>P<sub>F53F4.13</sub>:CED-12B:SL2:mCherry</i><br>+ <i>P<sub>unc-122</sub>:RFP</i>                |
| <i>dnaEx19, dnaEx30, dnaEx33</i>                    | pSAR7  | <i>P<sub>F53F4.13</sub>:PSR-1C:SL2:mCherry</i><br>+ <i>P<sub>unc-122</sub>:RFP</i>                 |
| <i>dnaEx29</i>                                      | pSAR8  | <i>P<sub>F53F4.13</sub>:CED-10B<sup>G12V</sup>:SL2:mCherry</i><br>+ <i>P<sub>unc-122</sub>:RFP</i> |
| <i>dnaEx51, dnaEx57, dnaEx59</i>                    | pSAR11 | <i>P<sub>F53F4.13</sub>:CED-10B<sup>T17N</sup>:SL2:mCherry</i><br>+ <i>P<sub>unc-122</sub>:RFP</i> |
| <i>dnaEx38, dnaEx39, dnaEx40,</i><br><i>dnaEx41</i> | pSAR12 | <i>P<sub>srtx-1b</sub>:SRTX-1:Dendra2</i><br>+ <i>P<sub>unc-122</sub>:RFP</i>                      |
| <i>nsEx5268, nsEx5363, nsEx5380</i>                 | pAS247 | <i>P<sub>F53F4.13</sub>:WSP-1:SL2:mCherry</i><br>+ <i>P<sub>mig-24</sub>:Venus</i>                 |

753

754 **Plasmids**

755 CED-10 PLASMIDS: *ced-10B* isoform cDNA was isolated from a mixed stage cDNA library by PCR  
756 amplification with primers containing Xma1 and Nhe 1 restriction enzyme sites and  
757 directionally ligated into pAS465 (*P<sub>F53F4.13</sub>:SL2:mCherry*) to generate pAS275 plasmid. CED-10<sup>G12V</sup>  
758 and CED-10<sup>T17N</sup> mutations were derived by site directed mutagenesis of pAS275 plasmid to

759 produce pSAR8 and pSAR11 respectively.

760

761 CED-12 PLASMIDS: *ced-12B* isoform cDNA was isolated from a mixed stage cDNA library by PCR  
762 amplification with primers containing a XmaI and NheI restriction enzyme sites and directionally  
763 ligated into pAS465 to generate the pSAR1 plasmid.

764

765 PSR-1 PLASMID: *psr-1 C* isoform cDNA was isolated from a mixed stage cDNA library by PCR  
766 amplification with primers containing BamHI and NheI restriction enzyme sites, and  
767 directionally ligated into pAS465 to generate the pSAR7 plasmid. K324E and K331E mutations  
768 were introduced by site directed mutagenesis of pSAR7 to produce pSAR15.

769

770 GFP:PSR-1 PLASMID: *psr-1C* isoform cDNA was isolated from a mixed stage cDNA library by PCR  
771 amplification with primers containing BamHI and PstI restriction enzyme sites and ligated into  
772 pAS516 (*P<sub>F53F4.13</sub>:GFP*) to produce pSAR18.

773

774 HisCl1 PLASMID: Histamine gated chloride channel sequence from pNP424(Pokala et al., 2014)  
775 was restriction digested with NheI and KpnI enzymes and ligated to pAS178 (*P<sub>SRTX-1</sub>:SL2:GFP*) to  
776 produce pAS540.

777

778 RECOMBINEERED FOSMIDS: The following fosmids with GFP recombineered in-frame in the  
779 coding sequence were obtained from the MPI-TransgeneOme Project: *gcy-8* (Clone ID:  
780 02097061181003035 C08), *gcy-18* (Clone ID: 9735267524753001 E03), *gcy-23* (Clone ID:

781 6523378417130642 E08).

782

### 783 **Microscopy, Image Processing and Analyses**

784 Animals were immobilized using either 2mM Tetramizole or 100nm polystyrene beads (Bangs  
785 Laboratories, Catalog # PS02004). Images were collected on a Deltavision Elite RoHS wide-field  
786 deconvolution system with Ultimate Focus(GE), a PlanApo 60x/1.42 NA or OLY 100x/1.40 NA  
787 oil-immersion objective and a DV Elite CMOS Camera. Super-resolution microscopy images  
788 were collected on the Leica VT-iSIM microscope or the Leica SP8 confocal with Lightning.  
789 Images were processed on ImageJ, Adobe Photoshop CC or Adobe Illustrator CC.

790         Binning categories for population analyses were based on preliminary analyses of  
791 population distribution of puncta numbers/animal in wild-type, and mutants with excess  
792 puncta (*tax-2*) or reduced puncta mutants (*ced-10*, *psr-1*). Preliminary analyses of these strains  
793 suggested that the bin intervals (0, 1-9 or 10+ puncta) are the most robust, conservative and  
794 rapid assessment of phenotypes. Higher than 10 puncta/cell were not readily resolved without  
795 post-processing and therefore binned together in population scores. Some genotypes were  
796 selected for further *post-hoc* single cell puncta quantification analyses. For this, glia puncta  
797 numbers of were quantified using Analyze Particles function in ImageJ on deconvolved images.  
798 Individual puncta size measurements were done on yz orthogonal rendering of optical sections  
799 using 3D objects counter plug-in in ImageJ.

800

### 801 **Electron Microscopy**

802 Adult hermaphrodites were fixed in 0.8% glutaraldehyde -0.8% osmium tetroxide-0.1 M

803 cacodylate buffer (pH 7.4) for 1 hr at 4°C in the dark and then rinsed quickly several times with  
804 0.1M cacodylate buffer. Animal heads were decapitated and fixed in 1% osmium tetroxide-0.1  
805 M cacodylate buffer overnight at 4°C, quickly rinsed several times in 0.1M Cacaodylate buffer  
806 and dehydrated through a graded ethanol series. The samples were then embedded in Eponate  
807 12 resin (Ted Pella, Inc, Redding CA) and polymerized overnight in a 60C oven. 70nm ultrathin  
808 serial sections were collected onto pioloform coated slot grids from the anterior tip of the  
809 animal to a distance of approximately 7um. Sections were examined on a JEOL 1400 TEM (JEOL,  
810 Tokyo, Japan) at an accelerating voltage of 120kV. Images were acquired with a Gatan Rio 4kx4k  
811 detector (Gatan, Inc, Pleasanton, CA). Microvilli size measurements were done with ImageJ  
812 Measure Function on electron micrograph thin sections.

813

#### 814 **Statistical Analyses**

815 Population puncta scoring was statistically analyzed using Chi Square statistical test in  
816 GraphPad Prism 8. Puncta images were quantified using Analyze Particles function in Image J  
817 and analyzed with Kruskal-Wallis Test with multiple comparison test in GraphPad Prism 8.

818

#### 819 **Chemo-genetic silencing and RNAi**

820 For chemo-genetic silencing assays, 10mM Histamine (Sigma, Catalog # H7250) was added to  
821 NGM agar plates. L4 larval stage transgenic worms expressing HisCl1 in AFD were grown for 24  
822 hours on either normal or Histamine plates and assayed as Day 1 adults (Pokala et al., 2014).  
823 Plasmids expressing double-stranded RNA (dsRNA) were obtained from the Ahringer  
824 library(Fraser et al., 2000; Kamath, 2003). The L4440 empty vector was used as negative



825 control. RNAi was performed by feeding synchronized L1 animals RNAi bacteria(Timmons,  
826 2004). L4 larva were moved to a fresh plate with RNAi bacteria and scored 24 hours later for  
827 glial puncta (*nsIs483*) or AFD-NRE defects (*nsIs645*).

828

### 829 **Animal Behavior Assays**

830 Thermotaxis assays were performed on a 18°-26°C linear temperature gradient(Hedgecock and  
831 Russell, 1975; Mori and Ohshima, 1995). Animals were synchronized and the staged progeny  
832 were tested on the first day of adulthood. Briefly, animals were washed twice with S-Basal and  
833 spotted onto the center of a 10-cm plate warmed to room temperature and containing 12 mL  
834 of NGM agar. The plate was placed onto the temperature gradient (17-26°C) with the addition  
835 of 5 mL glycerol to its bottom to improve thermal conductivity. At the end of 45 mins, the plate  
836 was inverted over chloroform to kill the animals and allowing easy counting of animals in each  
837 bin. The plates have an imprinted 6x6 square pattern which formed the basis of the 6  
838 temperature bins. Each data point is the average of 3-8 assays with ~150 worms/assay.

839 **Fig. S1.**  
840 **AMsh glia engulf AFD-NRE fragments. (A)** AFD-NRE labeled fragments observed across  
841 transgenic animal strains carrying different promoters or protein tags. X=axis: genotype; Y-axis:  
842 percent animals with AFD-NRE labeled puncta inside AMsh soma. N= number of animals  
843 analyzed. **(B)** Time-stamped stills from movie (Supplemental S1) of AFD-NRE dissociation of  
844 fragments. Each colored arrowhead tracks an individual fragment moving away from AFD-NRE.  
845 Scale bar: 5 $\mu$ m. **(C)** Quantification of average puncta diameter within AMsh glial cell soma **(D)**  
846 Quantification average AFD-NRE microvilli diameter from electron micrographs  
847 **(E)** Electron micrograph through AFD-NRE microvilli of an animal. An individual microvillum  
848 taken for diameter measurement in Fig 1E is outlined in yellow. Scale bar: 500nm **(F,G)**  
849 Quantification of puncta in ipsi- and contra-lateral AMsh glial cell soma with AFD neurons  
850 ablated by laser (F) or genetically (G). N= number of animals assayed.

**SUPPLEMENTARY FIGURE 1**

Raiders et al

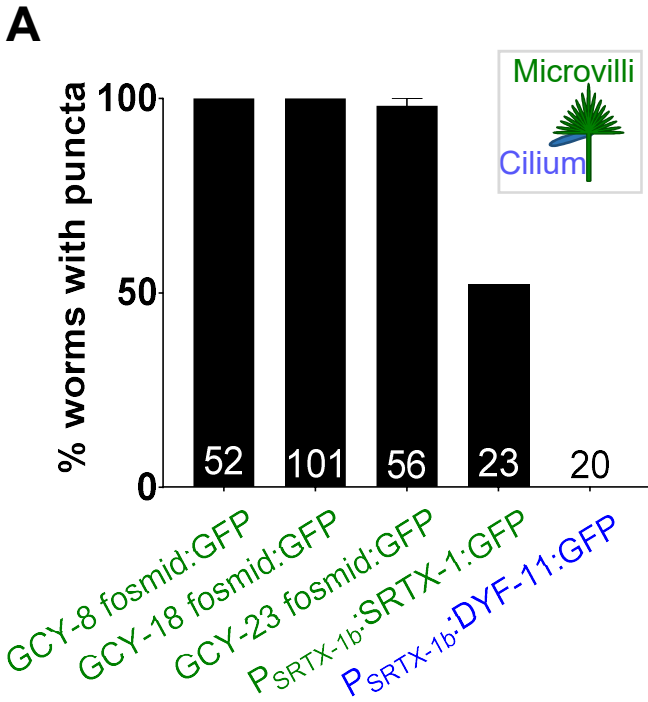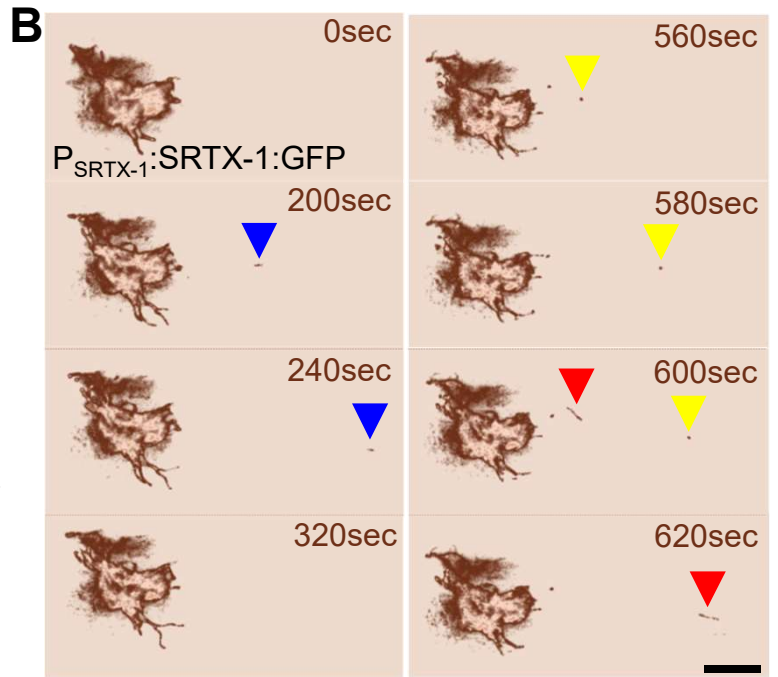

**C**

| Puncta average diameter (nm) | Average Deviation | N (animals) |
|------------------------------|-------------------|-------------|
| 541                          | 145               | 7           |

**D**

| Microvilli average diameter (nm) | Average Deviation | N (animals) |
|----------------------------------|-------------------|-------------|
| 214                              | 30                | 3           |

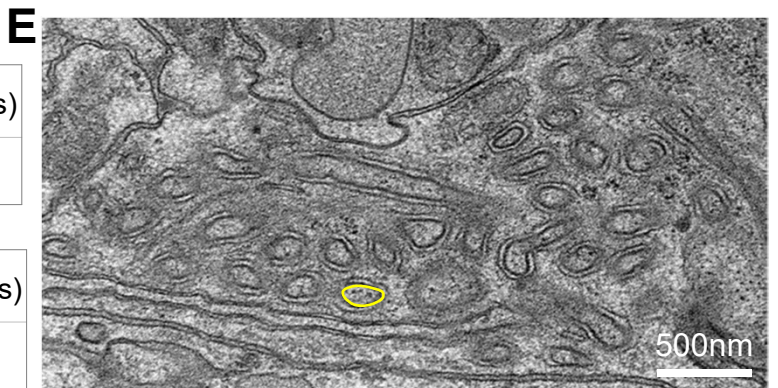

**F**

| Laser ablation in <i>nsIs483</i> | % animals with ipsilateral puncta | % animals with contralateral puncta | Total animals |
|----------------------------------|-----------------------------------|-------------------------------------|---------------|
| Mock ablation                    | 100                               | 100                                 | 58            |
| AFD ablation                     | 0                                 | 100                                 | 24            |

**G**

| Genetic ablation in <i>nsIs483; nsEx4616[P<sub>SRTX-1</sub>:EGL-1]</i> | % animals with ipsilateral puncta | % animals with contralateral puncta | Total animals |
|------------------------------------------------------------------------|-----------------------------------|-------------------------------------|---------------|
| AFD present                                                            | 100                               | 100                                 | 130           |
| AFD absent                                                             | 0                                 | 100                                 | 21            |

851 **Fig. S2.**  
852 **AMsh glia engulf AFD-NRE microvilli in activity-dependent manner.**

853 **(A)** Fluorescence and DIC micrographs showing expression of ciliary DYF-11:GFP under an AFD  
854 neuron-specific promoter in AFD cilia. C (arrowhead), cilia. D (arrow), AFD dendrite. **(B)** Average  
855 number of fragments in animals cultivated at 15, 20, or 25°C. Refer Figure 1I for data  
856 presentation details. Median puncta counts and N (number of animals): 15°C (6±2 puncta, n=8  
857 animals) , 20°C (15±1 puncta, n=54 animals), 25°C (27±3 puncta, n=16 animals) **(C)** Population  
858 counts of animals with AMsh glial puncta in animals with RNAi (control, *pat-2*) in *tax-2(p691)*  
859 (A) or *tax-2(p691); psr-1(tm469)* mutant (B) animals. Refer Figure 1H for data presentation  
860 details.

SUPPLEMENTARY FIGURE 2

Raiders et al

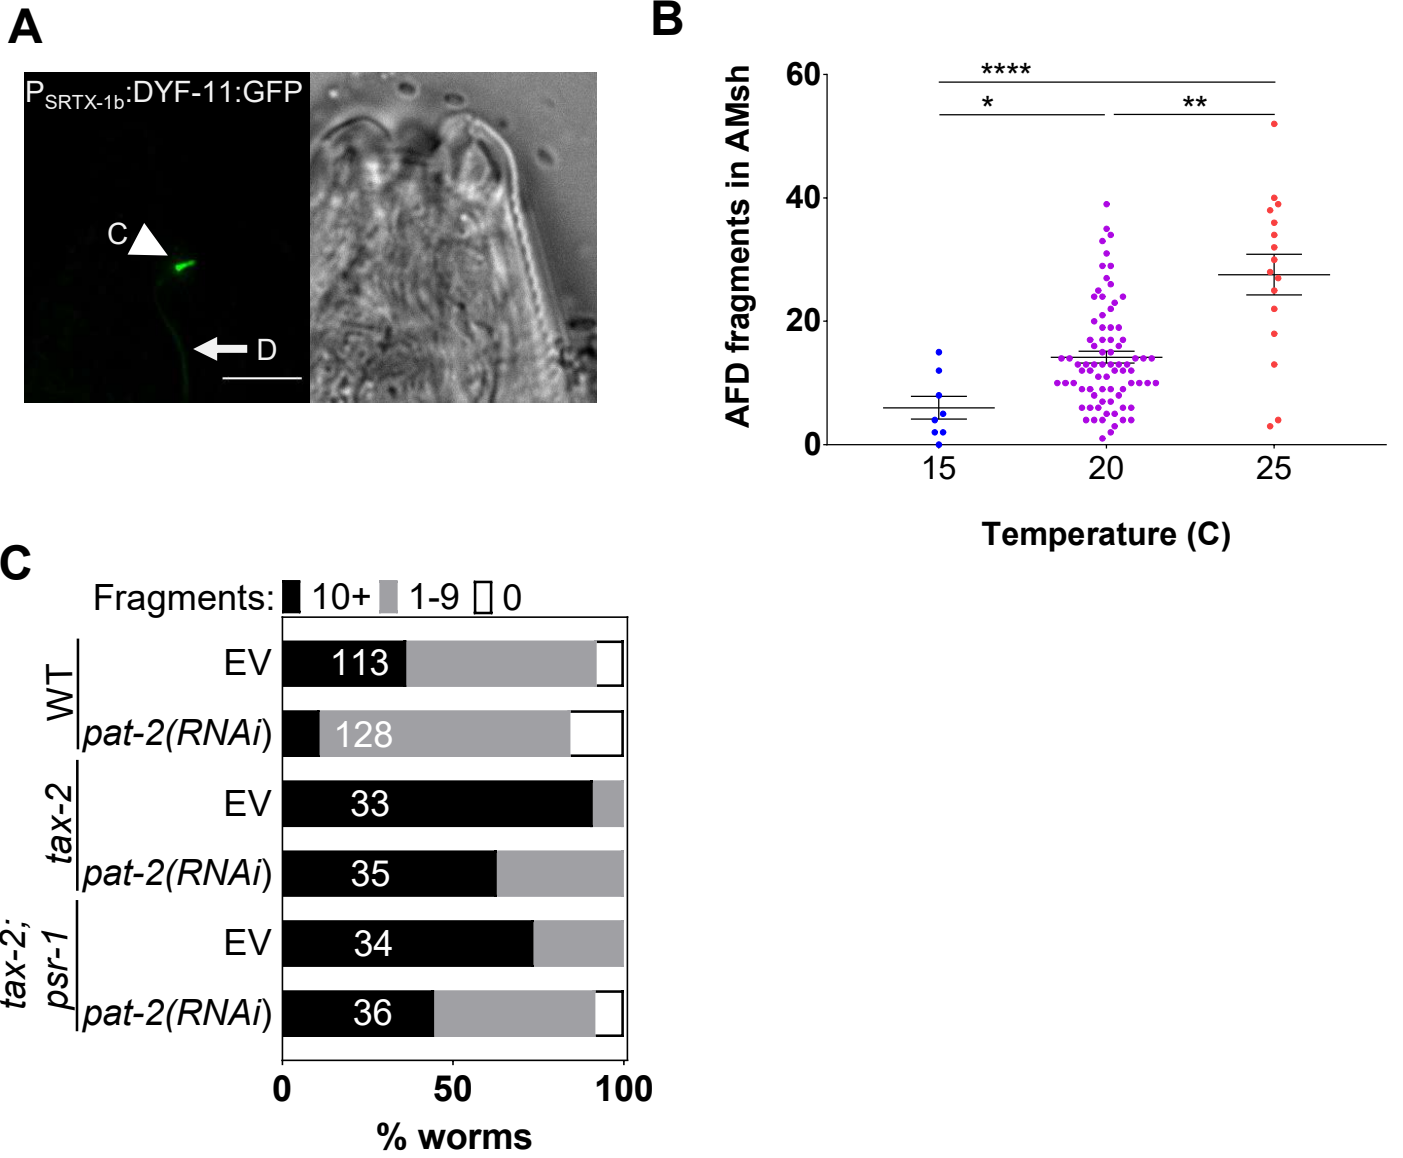

861 **Fig. S3.**  
862 **AMsh glia engulf AFD-NRE by repurposing components of the phagocytosis machinery. (A)**  
863 Schematic of the genetic pathway underlying apoptotic corpse engulfment in *C. elegans*. **(B)**  
864 Percent animals with AMsh glial puncta in genetic backgrounds indicated. N= number of  
865 animals scored. Refer Extended Figure 1B for data presentation details.

# SUPPLEMENTARY FIGURE 3

Raiders et al

## A

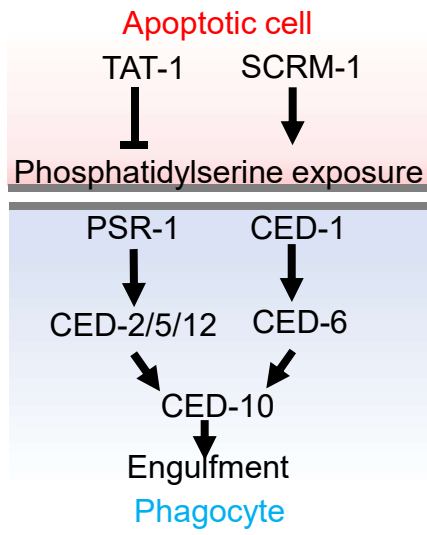

## B

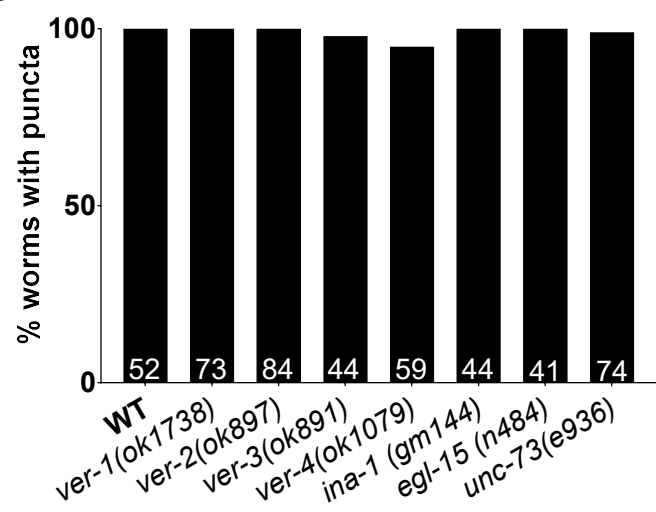

866 **Fig. S4.**  
867 **Activation of CED-10/Rac1 regulates AFD NRE shape (A)** Day 1 AFD NRE defects in animals  
868 expressing constitutive active CED-10<sup>G12V</sup> in AMsh glia. **(B)** Proportion of worms with defective  
869 AFD-NRE shape on Day 1 and 3 of adulthood in animals expressing constitutive active CED-  
870 10<sup>G12V</sup> or dominant negative CED-10<sup>T17N</sup>.



**SUPPLEMENTARY FIGURE 4**

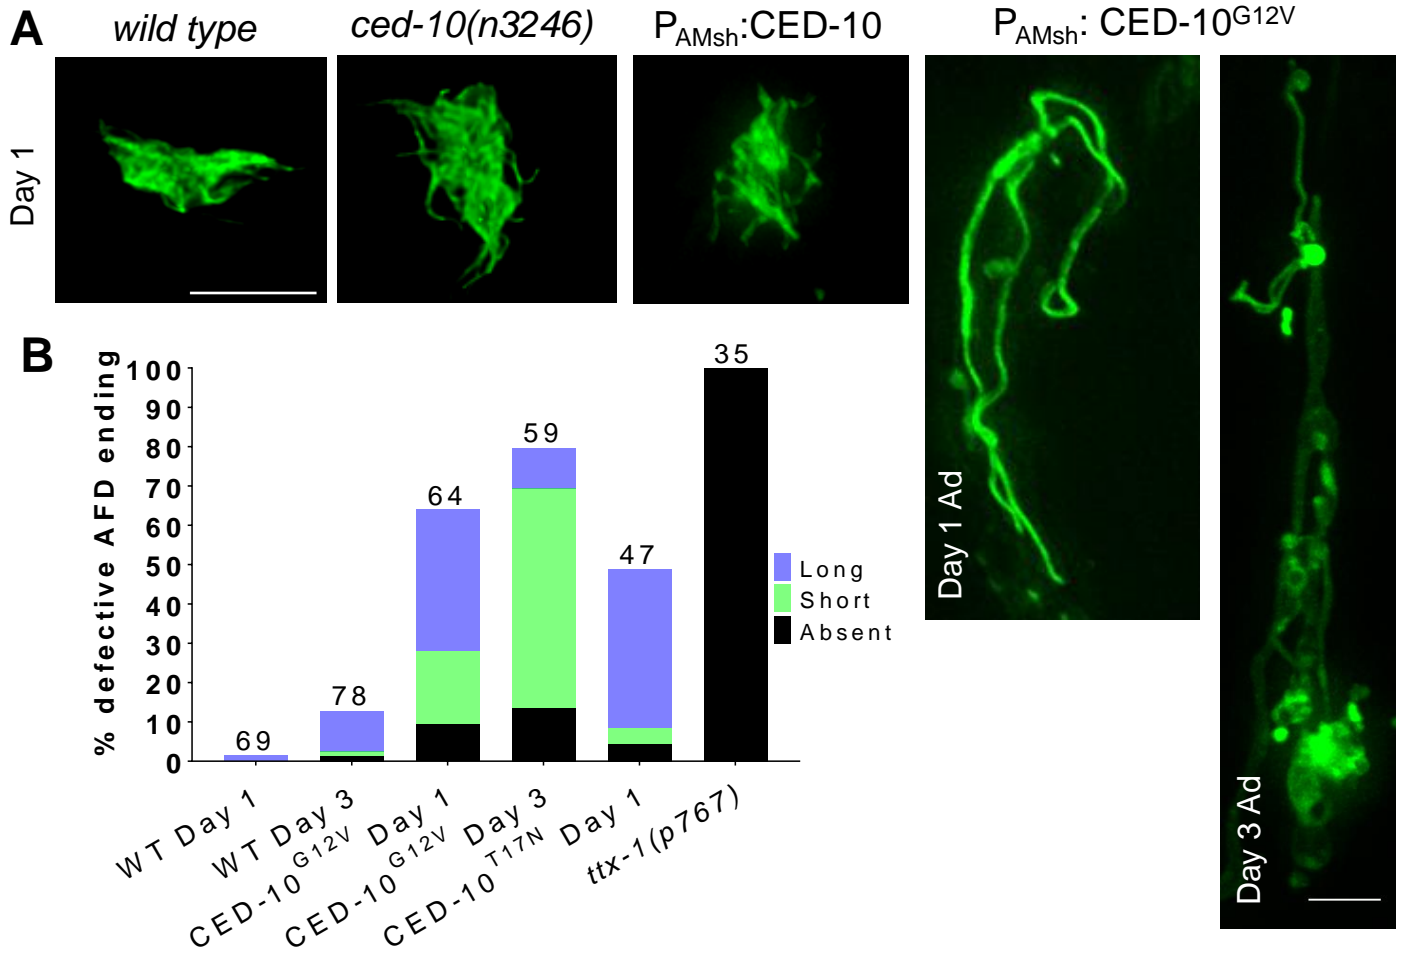

871 **Movie S1.**

872 **Dissociation of AFD-NRE fragments.**

873 Movie of an animal's AFD-NRE, labeled with GFP and imaged *in vivo* at 7 frames/second, shows

874 fragments blebbing at regular intervals.

875

876 **SUPPLEMENTARY MATERIALS REFERENCES**

877

- 878 Abraham, M.C., Lu, Y., and Shaham, S. (2007). A morphologically conserved nonapoptotic  
879 program promotes linker cell death in *Caenorhabditis elegans*. *Dev Cell* *12*, 73-86.
- 880 Armenti, S.T., Lohmer, L.L., Sherwood, D.R., and Nance, J. (2014). Repurposing an endogenous  
881 degradation system for rapid and targeted depletion of *C. elegans* proteins. *Development* *141*,  
882 4640-4647.
- 883 Bacaj, T., Tevlin, M., Lu, Y., and Shaham, S. (2008). Glia are essential for sensory organ  
884 function in *C. elegans*. *Science* *322*, 744-747.
- 885 Colosimo, M.E., Brown, A., Mukhopadhyay, S., Gabel, C., Lanjuin, A.E., Samuel, A.D., and  
886 Sengupta, P. (2004). Identification of thermosensory and olfactory neuron-specific genes via  
887 expression profiling of single neuron types. *Curr Biol* *14*, 2245-2251.
- 888 Fraser, A.G., Kamath, R.S., Zipperlen, P., Martinez-Campos, M., Sohrmann, M., and Ahringer,  
889 J. (2000). Functional genomic analysis of *C. elegans* chromosome I by systematic RNA  
890 interference. *Nature* *408*, 325-330.
- 891 Hedgecock, E.M., and Russell, R.L. (1975). Normal and mutant thermotaxis in the nematode  
892 *Caenorhabditis elegans*. *Proc Natl Acad Sci U S A* *72*, 4061-4065.
- 893 Kamath, R. (2003). Genome-wide RNAi screening in *Caenorhabditis elegans*. *Methods* *30*, 313-  
894 321.
- 895 Miyabayashi, T., Palfreyman, M.T., Sluder, A.E., Slack, F., and Sengupta, P. (1999). Expression  
896 and function of members of a divergent nuclear receptor family in *Caenorhabditis elegans*. *Dev*  
897 *Biol* *215*, 314-331.
- 898 Mori, I., and Ohshima, Y. (1995). Neural regulation of thermotaxis in *Caenorhabditis elegans*.  
899 *Nature* *376*, 344-348.
- 900 Pokala, N., Liu, Q., Gordus, A., and Bargmann, C.I. (2014). Inducible and titratable silencing of  
901 *Caenorhabditis elegans* neurons in vivo with histamine-gated chloride channels. *Proc Natl Acad*  
902 *Sci U S A* *111*, 2770-2775.
- 903 Procko, C., Lu, Y., and Shaham, S. (2011). Glia delimit shape changes of sensory neuron  
904 receptive endings in *C. elegans*. *Development* *138*, 1371-1381.
- 905 Singhvi, A., Liu, B., Friedman, C.J., Fong, J., Lu, Y., Huang, X.Y., and Shaham, S. (2016). A  
906 Glial K/Cl Transporter Controls Neuronal Receptive Ending Shape by Chloride Inhibition of an  
907 rGC. *Cell* *165*, 936-948.
- 908 Timmons, L. (2004). Endogenous inhibitors of RNA interference in *Caenorhabditis elegans*.  
909 *Bioessays* *26*, 715-718.
- 910
